1 **Category:** Original Article

2 **Running head:** GWAS on 'neck or shoulder pain'

3

4 **A genome-wide association study finds genetic variants**  
5 **associated with neck or shoulder pain in UK Biobank**

6 **Authors:** Weihua Meng<sup>1\*</sup>, Brian W Chan<sup>1\*</sup>, Cameron Harris<sup>1</sup>, Maxim B Freidin<sup>2</sup>,  
7 Harry L Hebert<sup>1</sup>, Mark J Adams<sup>3</sup>, Archie Campbell<sup>4</sup>, Caroline Hayward<sup>5</sup>, Hua Zheng<sup>6</sup>,  
8 Xianwei Zhang<sup>6</sup>, Lesley A Colvin<sup>1</sup>, Tim G Hales<sup>7</sup>, Colin NA Palmer<sup>1</sup>, Frances MK  
9 Williams<sup>2</sup>, Andrew McIntosh<sup>3</sup>, Blair H Smith<sup>1</sup>.

10

11 <sup>1</sup> Division of Population Health and Genomics, Medical Research Institute, Ninewells  
12 Hospital and School of Medicine, University of Dundee, Dundee, UK, DD2 4BF

13 <sup>2</sup> Department of Twin Research and Genetic Epidemiology, School of Life Course  
14 Sciences, King's College London, London, UK, SE1 7EH

15 <sup>3</sup> Division of Psychiatry, Edinburgh Medical School, University of Edinburgh,  
16 Edinburgh, UK, EH10 5HF

17 <sup>4</sup> Centre for Genomic and Experimental Medicine, Institute of Genetics and  
18 Molecular Medicine, University of Edinburgh, Western General Hospital, Edinburgh,  
19 UK, EH4 2XU

20 <sup>5</sup> Medical Research Council Human Genetics Unit, Institute of Genetics and  
21 Molecular Medicine, University of Edinburgh, Western General Hospital, Edinburgh,  
22 UK, EH4 2XU

23 <sup>6</sup> Department of Anaesthesiology, Tongji Hospital, Tongji Medical College, Huazhong  
24 University of Science and Technology, Wuhan, China

25 <sup>7</sup> Institute for Academic Anaesthesia, Division of Systems Medicine, School of

26 Medicine, Ninewells Hospital, University of Dundee, Dundee, UK

27 \* These two authors contributed to this paper equally.

28 **Corresponding Author:** Dr Weihua Meng, Ph.D.

29 Address: Division of Population Health and Genomics, School of Medicine,  
30 University of Dundee, Dundee, UK, DD2 4BF.

31 Tel: +44 1382383419; Fax: +44 1382383802. E-mail: [w.meng@dundee.ac.uk](mailto:w.meng@dundee.ac.uk)

32

33 **Funding Sources:** This study was mainly funded by the Wellcome Trust Strategic  
34 Award “Stratifying Resilience and Depression Longitudinally” (STRADL) with  
35 reference number 104036/Z/14/Z and by the GCRF academic exchange visits to  
36 China funded by the University of Dundee.

37 Generation Scotland: Scottish Family Health Studies (GS:SFHS) received core  
38 support from the Chief Scientist Office of the Scottish Government Health  
39 Directorates (CZD/16/6) and the Scottish Funding Council (HR03006).

40 TwinsUK is funded by the Wellcome Trust, Medical Research Council, European  
41 Union, Chronic Disease Research Foundation (CDRF), Zoe Global Ltd, the National  
42 Institute for Health Research (NIHR)-funded BioResource, Clinical Research Facility  
43 and Biomedical Research Centre based at Guy’s and St Thomas’ NHS Foundation  
44 Trust in partnership with King’s College London.

45 **Conflicts of Interest:** None declared.

46

47 **Significance:** This is the first genome-wide association study on neck or shoulder  
48 pain. We have identified 3 genetic loci (an intergenic region in chromosome 17, the  
49 *FOXP2* gene in chromosome 7, and the *LINC01572* gene in chromosome 16) that  
50 are associated with neck or shoulder pain using the UK Biobank cohort, among

51 which the *FOXP2* gene and the *LINC01572* gene were weakly replicated by the  
52 Generation Scotland: Scottish Family Health Study ( $P < 0.05$ ). The SNP heritability  
53 was 0.11, indicating neck or shoulder pain is a heritable trait. The tissue expression  
54 analysis suggested that neck or shoulder pain was related to multiple brain tissues,  
55 indicating the involvement of neuron function. The results will inform further research  
56 in the characterisation of the mechanisms of neck or shoulder pain.

57

## 58 **ABSTRACT**

59 **Background:** Common types of musculoskeletal conditions include pain in the neck  
60 and shoulder areas. This study seeks to identify the genetic variants associated with  
61 neck or shoulder pain based on a genome-wide association approach using 203,309  
62 subjects from the UK Biobank cohort and look for replication evidence from the  
63 Generation Scotland: Scottish Family Health Study (GS:SFHS) and TwinsUK.

64 **Methods:** Cases in the UK Biobank were determined by a question which asked the  
65 participants if they had experienced pain in the neck or shoulder in the previous  
66 month influencing daily activities. Controls were the UK Biobank participants who  
67 reported no pain anywhere in the last month. A genome-wide association study was  
68 performed adjusting for age, sex, BMI and 9 population principal components.  
69 Significant and independent genetic variants were then sent to GS:SFHS and  
70 TwinsUK for replication.

71 **Results:** We identified 3 genetic loci that were associated with neck or shoulder pain  
72 in the UK Biobank samples. The most significant locus was in an intergenic region in  
73 chromosome 17, rs12453010, having  $P = 1.66 \times 10^{-11}$ . The second most significant  
74 locus was located in the *FOXP2* gene in chromosome 7 with  $P = 2.38 \times 10^{-10}$  for  
75 rs34291892. The third locus was located in the *LINC01572* gene in chromosome 16

76 with  $P = 4.50 \times 10^{-8}$  for rs62053992. In the replication stage, among 4 significant and  
77 independent genetic variants, rs2049604 in the *FOXP2* gene and rs62053992 in the  
78 *LINC01572* gene were weakly replicated in GS:SFHS ( $P = 0.0240$  and  $P = 0.0202$ ,  
79 respectively). None of the single nucleotide polymorphisms (SNPs) were replicated  
80 in the TwinsUK cohort ( $P > 0.05$ ).

81 **Conclusions:** We have identified 3 loci associated with neck or shoulder pain in the  
82 UK Biobank cohort, two of which were weakly supported in a replication cohort.  
83 Further evidence is needed to confirm their roles in neck or shoulder pain.

84 **Key words:** neck pain, shoulder pain, GWAS, genetics, FOXP2, UK Biobank

85

## 86 INTRODUCTION

87 Musculoskeletal pain in the neck and shoulder areas is a major health problem for  
88 adults of working age as well as for elderly populations (1). Neck and shoulder pain  
89 are prevalent forms of self-reported musculoskeletal pain (2). The aetiologies of neck  
90 and shoulder pain may be complicated since both regional lesions and systemic  
91 disorders outside the cervicobrachial area may cause pain at that location (3,4). In  
92 addition, lesions in the neck can lead to pain in the shoulder and vice versa (5).  
93 Many people also have difficulty in describing and differentiating pain in these areas  
94 accurately. For these reasons, neck or shoulder pain is often discussed as a single  
95 entity (6).

96 Epidemiological studies have suggested that the prevalence of neck pain is 6-22%  
97 and 7-27% for shoulder pain (7–9). The Global Burden of Disease Study 2010 found  
98 that of the 291 conditions studied, neck or shoulder pain as a single entity ranked  
99 21st in overall burden on society, and 4th in terms of overall disability (8). The  
100 updated Global Burden of Disease Study 2016 also indicated that neck pain was a

101 top five cause of years lived with disability (YLD) in high-income, and high-middle-  
102 income countries.(10) Risk factors associated with neck or shoulder pain conform to  
103 the biopsychosocial model; specifically, they include older age, being female, high  
104 body mass index (BMI), previous injury, strenuous occupation and diabetes mellitus  
105 (3,11–14). Although mechanical exposure is associated with increased risk of pain in  
106 the neck and shoulder, this explains only part of these complaints (15). Because of  
107 the biopsychosocial factors involved, treating neck or shoulder pain successfully is a  
108 challenge. In a study of neck, shoulder and arm pain, only 25% of the patients made  
109 a complete recovery after 6 months (16). Estimated rates of remission 1 year after  
110 neck or shoulder pain onset were between 33-55% (17–20).

111 Genetic studies have identified genes associated with neck or shoulder pain. Twin  
112 studies have shown that there is a genetic role in neck pain (14), though in keeping  
113 with many traits the genetic component becomes smaller with age (21,22).  
114 Nonetheless, in adolescents as much as 68% of variance in neck pain liability could  
115 be attributed to genetic factors (23). So far there has been no genome-wide  
116 association study (GWAS) published on neck or shoulder pain.

117 This study seeks to identify the genetic variants associated with neck or shoulder  
118 pain based on a GWAS approach in a cohort of 203,309 subjects from the UK  
119 Biobank cohort and to test significant results for replication in the Generation  
120 Scotland: Scottish Family Health Study (GS:SFHS) and TwinsUK. Similar  
121 approaches have been used to examine back pain, knee pain, and headaches in the  
122 UK Biobank cohort (24–26).

123

## 124 **METHODS**

### 125 **Participants and the genetic information of cohorts**

126 Discovery cohort - The UK Biobank (<https://www.ukbiobank.ac.uk/>) is a project  
127 facilitating research into health and disease and involves over 500,000 participants  
128 aged between 40-69 years old at recruitment. Participants completed a detailed  
129 questionnaire which examined lifestyle, demographic factors, and clinical history.  
130 Participants also underwent clinical measures and baseline body measurements  
131 such as height and weight. Biological samples including urine, saliva, and blood  
132 were also provided. The National Research Ethics Service granted ethical approval  
133 to the UK Biobank (reference 11/NW/0382). The genetic information of 500,000  
134 participants was released to approved researchers in March 2018. The  
135 corresponding author of this paper was granted access to the genetic information  
136 under UK Biobank application number 4844. Detailed quality control information  
137 pertaining to these genotypes was described by Bycroft et al (27).

138 Replication cohort 1 - Generation Scotland: Scottish Family Health Study (GS:SFHS)  
139 is a multi-institutional, family-based cohort involving over 20,000 volunteer  
140 participants aged between 18-98 years old at recruitment, who provided blood  
141 samples from which DNA was extracted. Similarly, participants also completed  
142 questionnaires to provide detailed phenotypic and sociodemographic information.  
143 Clinical and biochemical measurements were also collected for the purpose of  
144 research. Permission was obtained for linkage of research data to routine health  
145 data in the form of electronic health records (28,29). Ethical approval for GS:SFHS  
146 was obtained from the Tayside Committee on Medical Research Ethics (on behalf of  
147 the National Health Service) with reference Number 05/S1401/89. The genetic  
148 information relating 20,000 participants was released to the corresponding author of

149 this paper in March 2018 for pain-related research. Detailed quality control  
150 information pertaining to these genotypes was described by Hall et al (30).

151 Replication cohort 2 - The TwinsUK cohort is a UK nationwide registry of volunteer  
152 same sex twins. It has recruited 14,274 registered twins aged between 16 and 98  
153 years. Collection of data and biological materials commenced in 1992 and is ongoing.  
154 During study participation, participants regularly complete health and lifestyle  
155 questionnaires and visit collaborating clinics and hospitals for clinical evaluation.  
156 Ethical approval was provided by the Research Ethics Committee at Guy's and St.  
157 Thomas' NHS Foundation Trust. TwinsUK has the genetic information relating to  
158 6,921 participants. Detailed quality control information pertaining to the genetic  
159 information was described by Moayyeri et al (31).

#### 160 **Phenotypic definitions on neck or shoulder pain**

161 Discovery cohort - UK Biobank: Participants were offered a pain-related  
162 questionnaire, which included the question: 'in the last month have you experienced  
163 any of the following that interfered with your usual activities?'. The options were: 1.  
164 Headache; 2. Facial pain; 3. Neck or shoulder pain; 4. Back pain; 5. Stomach or  
165 abdominal pain; 6. Hip pain; 7. Knee pain; 8. Pain all over the body; 9. None of the  
166 above; 10. Prefer not to say. Participants could select more than one option. (UK  
167 Biobank Questionnaire field ID: 6159).

168 In this study, cases were defined as participants who reported having activity limiting  
169 pain in the neck or shoulder in the past month (option 3), regardless of whether they  
170 reported pain in other regions. The controls were defined as participants who chose  
171 the 'None of the above' option.

172 Replication cohort 1 – GS:SFHS: Participants were first asked "Are you currently  
173 troubled by pain or discomfort, either all the time or on and off?". If yes was selected,

174 then the participants were asked "Have you had this pain or discomfort for more than  
175 3 months?". If yes was selected once again, then they were asked "Where is this  
176 pain or discomfort?" with options of 'Back pain', 'Neck or shoulder pain', 'Headache,  
177 facial or dental pain', 'Stomach ache or abdominal pain', 'Pain in your arms, hands,  
178 hips, legs or feet', 'Chest pain', and 'Other pain'. If a participant selected the 'Neck or  
179 shoulder pain', then he/she was defined as a case. All other subjects were defined  
180 as controls.

181 Replication cohort 2: TwinsUK: participants were asked 'In the past three months,  
182 have you had pain in your neck or shoulders?' Those who answered 'Yes' were  
183 defined as cases. Those who answered 'No' were defined as controls. Those with  
184 missing answers were not included in the study.

### 185 **Statistical Analysis**

186 Discovery cohort – UK Biobank: BGENIE (<https://jmarchini.org/bgenie/>) was used as  
187 the main GWAS software. Single nucleotide polymorphisms (SNPs) with imputation  
188 INFO scores  $< 0.1$ , minor allele frequency (MAF)  $< 0.5\%$  were removed, as well as  
189 SNPs that failed Hardy-Weinberg tests  $P < 1.0 \times 10^{-6}$ .

190 BGENIE was used to perform association studies using linear association tests,  
191 adjusting for age, sex, BMI, 9 population principle components, genotyping arrays,  
192 and assessment centres. Chi-square testing was used to compare gender difference  
193 between cases and controls. T-tests were used to compare age and BMI between  
194 case and control groups using IBM SPSS 22 (IBM Corporation, New York). As is  
195 standard in GWAS, SNP associations were considered significant when  $P < 5.0 \times 10^{-8}$ .  
196 <sup>8</sup>. Genome-wide Complex Trait Analysis (GCTA) software was used to calculate  
197 SNP-based or narrow-sense heritability (32). Significant and independent SNPs from  
198 the GWAS results of the discovery cohort were then sent to replication cohorts for



199 replication. These significant and independent SNPs were defined by FUMA with  $r^2$   
200 (linkage disequilibrium score)  $< 0.6$  with any other significant SNPs.

201 Replication cohort 1 – GS:SFHS: GCTA fastGWA1.92.4 was the main software used  
202 for replication. (<https://cnsgenomics.com/software/gcta/#fastGWA>). SNPs with INFO  
203 scores  $< 0.3$ , or MAF  $< 1\%$  were removed, as well as SNPs that failed Hardy-  
204 Weinberg tests  $P < 1.0 \times 10^{-6}$ . FastGWA was used to perform association studies  
205 using a mixed-effects linear model adjusting for age, sex, BMI, and 9 population  
206 principle components. Relatedness was adjusted for via a genetic kinship matrix.

207 Replication cohort 2 – TwinsUK: GEMMA v 0.98.1 was used for replication  
208 (<https://github.com/genetics-statistics/GEMMA>). A mixed-effects linear model  
209 adjusting for age, sex, BMI, and relatedness via a genetic kinship matrix was used.

210 Meta-analysis of the significant and independent SNPs combining the UK Biobank,  
211 GS:SFHS and TwinsUK was performed using GWAMA 2.2.2  
212 (<https://genomics.ut.ee/en/tools/gwama>).

213 Post-GWAS analysis: This study used FUMA as a main annotation tool for viewing  
214 and annotating GWAS results (33). It applied SNP functional annotations and  
215 generated a corresponding GWAS Manhattan plot.

216 MAGMA v1.06 (integrated in FUMA) was used to perform gene-based association  
217 analysis and gene-set analysis, both of which were generated from GWAS summary  
218 statistics (34). For gene-based association analysis, all SNPs located in protein  
219 coding genes are mapped to one of 19,123 protein coding genes. The default SNP-  
220 wise model (mean) was applied. We tested the joint association of all SNPs in the  
221 gene with the phenotype by aggregating the SNP summary statistics to the level of  
222 whole genes. In gene-set analysis, individual genes were aggregated to groups of  
223 genes sharing certain biological, functional or other characteristics. This aims to

224 elucidate the involvement of specific biological pathways or cellular functions in the  
225 genetic aetiology of a phenotype. GTEx (also integrated in FUMA,  
226 <https://www.gtexportal.org/home/>) provided the results of tissue expression analysis.  
227 Genetic correlation analysis was also performed to identify genetic correlation  
228 between neck or shoulder pain and 234 complex traits based on the online tool LD  
229 hub v1.9.0 (<http://ldsc.broadinstitute.org/ldhub/>). Any  $P$  value less than  $2.1 \times 10^{-4}$   
230 ( $0.05/234$ ) was considered statistically significant by Bonferroni adjusted testing.

231

## 232 **RESULTS**

### 233 **GWAS Results**

234 In the UK Biobank, 775,252 responses to all options were received for the specific  
235 pain question. Of the 501,708 participants in the study, 123,061 participants reported  
236 having experienced activity limiting pain in the neck or shoulder in the previous  
237 month. 213,408 participants chose the 'None of the above' option which meant they  
238 did not have activity limiting pain anywhere in the previous month. To create a  
239 homogeneous dataset, we first removed samples according to their ancestry  
240 information. In addition, those who were related to one or more others in the cohort  
241 (a cut-off value of 0.044 in the generation of the genetic relationship matrix) and  
242 those who failed quality control were also removed. The final number of those  
243 included in the case group after the above exclusions was 53,994 (28,093 males,  
244 25,901 females). 149,312 (71,480 males, 77,832 females) individuals were included  
245 in the control group. After SNP quality control, there were 9,304,965 SNPs available  
246 for GWAS analysis. Clinical characteristics of the case and control groups were  
247 compiled (Table 1). Age, sex, and BMI were all found to be significantly different ( $P <$   
248 0.001) between cases and controls. Three genetic loci including 4 significant and

249 independent SNPs reached a GWAS significance of  $P < 5 \times 10^{-8}$  (Figure 1, Table 2).  
250 The most significant locus was located in an intergenic region in chromosome 17.  
251 The SNP from this location of highest significance was rs12453010 ( $P = 1.66 \times 10^{-10}$ ).  
252 The second locus was found in the *FOXP2* gene located in chromosome 7, and the  
253 most significant SNP from this locus was rs34291892 ( $P = 2.38 \times 10^{-10}$ ). The third  
254 locus was the *LINC01572* gene located in chromosome 16, and the most significant  
255 SNP in this locus was rs62053992 ( $P = 4.50 \times 10^{-10}$ ). The SNP heritability (liability  
256 scale) from GCTA was  $0.11 \pm 0.017$ .  
257 These 4 significant and independent SNPs were tested for replication in GS:SFHS  
258 and TwinsUK. Among 20,032 subjects in the GS:SFHS subjects, 19,632 had  
259 complete relevant information. The whole-genome fastGWA results did not find any  
260 SNPs with GWAS significance associated with neck or shoulder pain.  
261 (Supplementary Figure S1). Among the 4 SNPs from the discovery cohort,  
262 rs2049604 in the *FOXP2* gene and rs62053992 in the *LINC01572* gene were  
263 replicated weakly ( $P = 0.0240$  and  $0.0202$ , respectively) (Table 2). Of the 6,921  
264 individuals in TwinsUK with genetic information, 3,982 of them had valid relevant  
265 information on phenotypes and covariates. None of the 4 SNPs were replicated in  
266 the TwinsUK cohort ( $P > 0.05$ ).  
267 Meta-analysis of the 4 significant and independent hits, combining UK Biobank,  
268 GS:SFHS and Twins UK found that the significance of their associations was  
269 increased (Table 2).

## 270 **FUMA Analysis**

271 In gene-based association analysis by MAGMA, 26 genes were found to be  
272 associated with neck or shoulder pain, all of which are represented in Supplementary  
273 Table S1. The most significant gene was *FOXP2* ( $P = 1.62 \times 10^{-11}$ ), which is located

274 in chromosome 7.

275 In gene-set analysis conducted by MAGMA, 10,651 gene-sets were analysed using  
276 the default competitive test model. None of these gene-sets met genome-wide  
277 significance ( $P < 4.7 \times 10^{-6}$  (0.05/10651)).

278 Tissue expression analysis was conducted by GTEx, and the relationship between  
279 tissue specific gene expression and genetic associations was tested by using the  
280 average gene expression in each tissue type as a covariate. Two analyses were  
281 carried out, one investigating 30 general tissue types (Figure 2) and the other looking  
282 at 53 specific tissue types (Figure 3). Tissue expression analysis in 30 tissue types  
283 found expression in brain tissue to be the most significant ( $P = 9.53 \times 10^{-5}$ ). Only  
284 expression in brain and pituitary tissue reached significant values of  $P < 1.67 \times 10^{-3}$   
285 (0.05/30). Tissue expression analysis of 53 specific tissue types by GTEx found  
286 expression in the nucleus accumbens of the basal ganglia to be the most significant  
287 ( $P = 3.55 \times 10^{-5}$ ). In addition, the top 6 significant associations were all from brain  
288 tissues.

289 The genetic correlation analysis using the LD hub (v1.9.0) showed that symptoms of  
290 depression had the largest significant and positive genetic correlation with neck or  
291 shoulder pain ( $rg = 0.5522$ ,  $P = 3.41 \times 10^{-30}$ ), followed by insomnia ( $rg = 0.5377$ ,  $P =$   
292  $1.21 \times 10^{-21}$ ). It was also found that the age at which they have their first child had  
293 the most significant and negative genetic correlations with neck or shoulder pain ( $rg$   
294  $= -0.4812$ ,  $P = 8.95 \times 10^{-37}$ ), followed by college completion ( $rg = -0.4706$ ,  $P = 7.26 \times$   
295  $10^{-26}$ ). All the phenotypes with significant genetic correlation with neck or shoulder  
296 pain are shown in Table 3.

297

298 **DISCUSSION**

299 We have performed a GWAS on neck or shoulder pain using the UK Biobank  
300 resource and found 3 loci that have reached genome-wide significance ( $P < 0.05 \times$   
301  $10^{-8}$ ). They are the *FOXP2* gene in chromosome 7, the *LINC01582* gene in  
302 chromosome 16 and an intergenic area in chromosome 17. In the replication stage,  
303 the *FOXP2* and *LINC01582* loci were weakly supported by the GS:SFHS cohort, but  
304 not by TwinsUK.

305 *FOXP2* belongs to the forkhead-box transcription factor family and encodes a 715  
306 amino acid long transcription factor (35). It may have 300-400 transcription targets,  
307 and has a forkhead/winged helix binding domain with 2 polyglutamine tracts adjacent  
308 to each other due to a mixture of CAG and CAA repeats (36,37). *FOXP2* is a gene  
309 shown to be vital in the neural mechanisms underpinning the development of speech  
310 and language. A previous study described a family with developmental verbal  
311 dyspraxia, where affected individuals had a loss of function mutation in the *FOXP2*  
312 gene (38). Affected individuals in the family had difficulty with the selection and  
313 sequencing of fine orofacial muscular movements needed to articulate words, as well  
314 as deficits in language and grammatical skills. *FOXP2* also plays a role in regulating  
315 'hub' genes *Dlx5* and *Syt4* in animal models, which are important for brain  
316 development and function (39-41). The mutations in the *FOXP2* gene were also  
317 associated with decreased grey matter in the cerebellum (42).

318 Notably, *FOXP2* is expressed in several regions of the brain, namely the basal  
319 ganglia, locus coeruleus, parabrachial nucleus, and thalamus. All of these regions  
320 have been previously implicated in the modulation of pain (43-46), and also concur  
321 with the tissue expression analysis (Figure 2, Figure 3) which suggests that the  
322 central nervous system modulates neck or shoulder pain. A recent GWAS study  
323 suggested that *FOXP2* is a candidate gene for multisite chronic pain (47). Further

324 studies into the location and function of the transcription targets of *FOXP2* would  
325 also provide valuable insight.

326 The *LINC01572* gene in chromosome 16 was also replicated in this study, with  
327 rs62053992 having the *P* value at  $4.5 \times 10^{-8}$  in the discovery cohort and at 0.02 in the  
328 GS:SFHS. The gene is 384kb long, and was recently suggested to be related with  
329 polycystic ovary syndrome (48). However, studies of this gene have been very  
330 limited. Further replication evidence should be sought to confirm its role in neck or  
331 shoulder pain. Although the locus in chromosome 17 was not replicated, it was the  
332 most significantly associated in the discovery cohort with rs12453010 having the  
333 lowest *P* value of  $1.66 \times 10^{-11}$ . Analysis of this locus is also difficult as it is a gene  
334 desert area. The nearest neighbouring gene is *CA10*, which encodes a protein  
335 belonging to the carbonic anhydrase family and is responsible for catalysing the  
336 hydration of carbon dioxide. It is also thought to contribute to central nervous system  
337 development particularly in the brain (49).

338 The results of the meta-analysis of the 4 significant and independent SNPs  
339 combining 3 cohorts suggested that the loci identified by the UK Biobank cohort were  
340 supported by the GS:SFHS and TwinsUK. It is likely that the sample size in the  
341 TwinsUK (N= 3,982) was too small to replicate the loci for such a heterogeneous  
342 phenotype as neck or shoulder pain. In particular, for the 4 SNPs chosen for  
343 replication, the power to achieve a *P* value < 0.05 in the given TwinsUK sample  
344 ranged between 11.6% to 15.8% (50).

345 The SNP heritability of neck or shoulder pain was 0.11. This is similar to that of back  
346 pain (0.11), greater than knee pain (0.08), and less than: hip pain (0.12), stomach or  
347 abdominal pain (0.14), headache (0.21), facial pain (0.24), and pain all over the body  
348 (0.31) (51). Further, the genetic correlation matrix among 8 pain phenotypes in the

349 UK Biobank showed that the neck or shoulder pain and back pain shared the highest  
350 genetic correlation ( $r_g = 0.83$ ) (51).

351 The genetic correlation analysis results were perhaps to be expected. Like knee pain  
352 and back pain, which have been shown to be positively correlated with depression  
353 and neuroticism (51), neck or shoulder pain was correlated genetically and positively  
354 with some mental health and personality phenotypes. We also identified that neck or  
355 shoulder pain was genetically and negatively correlated with the age at which they  
356 have their first child, college completion, and years of schooling. This means that  
357 those who were older when they had their first child, those with more years of  
358 schooling, and those with completed college education were less likely to report neck  
359 or shoulder pain. These factors could be related to a number of factors including  
360 lifestyle, deprivation levels, and occupation. It is interesting to note that males are  
361 more likely to report neck or shoulder pain than females in the UK Biobank  
362 population. This is matched with the fact that males are more likely to have  
363 strenuous occupations. However, we should note, in general, female sex is a risk  
364 factor for neck or shoulder pain.

365 The primary limitation of this study is that different (albeit similar) case and control  
366 definitions were used in the discovery and replication cohorts. This was a  
367 consequence of the pre-determined phenotypic information that was present in the  
368 relevant cohorts. We defined neck or shoulder pain cases and controls based on the  
369 responses by UK Biobank participants to a specific pain question. This question  
370 focused on neck or shoulder pain occurrence during the previous month that was  
371 sufficient to cause interference with activity. The severity, frequency, and exact  
372 location of the neck or shoulder pain were not documented. Hence, our phenotyping  
373 should be considered as broadly defined. In the GS:SFHS and Twins UK cohorts,

374 the disease status of participants was also self-reported, while cases were those  
375 who having neck or shoulder pain over the past 3 months, controls were those who  
376 could have neck or shoulder pain less than 3 months or have pain in other body sites.  
377 While in the UK Biobank, controls were defined as pain free for the past month.  
378 Differences between (albeit similar) the case and control definitions could have a  
379 negative impact on replication of the results while this impact is hard to evaluate  
380 Differences between the case and control definitions could have a negative impact  
381 on replication of the results although this impact would be hard to evaluate. There  
382 could also be some cases who report neck or shoulder pain as a result of underlying  
383 causes such as cancer and osteoarthritis in the neck and shoulder areas. Their  
384 impact to the results would be very limited due to the small numbers.  
385 In summary, we have identified 3 loci of genome-wide significance ( $P < 5 \times 10^{-8}$ )  
386 associated with neck or shoulder pain in the UK Biobank dataset using a GWAS  
387 approach. Two of these loci were replicated weakly in the GS:SFHS cohort.  
388 Identification of these loci now provides a foundation for future work into  
389 understanding genetic roles and aetiology in neck or shoulder pain.

390

## 391 **ACKNOWLEDGEMENTS**

392 We would like to thank all participants of the UK Biobank, Generation Scotland and  
393 TwinsUK cohorts who have provided necessary genetic and phenotypic information.  
394 This research has been conducted using the UK Biobank Resource under  
395 Application Number 4844.  
396 Generation Scotland is grateful to all the families who took part, the general  
397 practitioners and the Scottish School of Primary Care for their help in recruiting them,  
398 and the whole Generation Scotland team, which includes interviewers, computer and



399 laboratory technicians, clerical workers, research scientists, volunteers, managers,  
400 receptionists, healthcare assistants, and nurses.

401

#### 402 **Data availability**

403 The GWAS summary statistics of neck or shoulder pain can be accessed through  
404 <https://figshare.com/articles/fourpainphenotype2/7699583>

405

#### 406 **Conflict of interest**

407 The authors declare that they have no conflict of interest.

408

#### 409 **AUTHOR CONTRIBUTIONS**

410 WM organised the project, drafted the paper and contributed to the analysis. BWC  
411 and CH contributed to drafting the paper. MBF provided the TwinsUK replication. MA  
412 performed the main UK Biobank GWAS analysis. AC and CH contributed to  
413 GS:SFHS cohorts. HLH, HZ, XZ, CNAP, LC, TGH and FMKW provided essential  
414 comments. AM and BS organised the project and provided comments.

415 **REFERENCES**

- 416 1. Vogt, M. T., Simonsick, E. M., Harris, T. B., et al. Neck and shoulder pain in 70-  
417 to 79-year-old men and women: findings from the Health, Aging and Body  
418 Composition Study. *Spine J.*, **3**, 435–441.
- 419 2. Picavet, H. S. J. and Schouten, J. S. A. G. (2003) Musculoskeletal pain in the  
420 Netherlands: prevalences, consequences and risk groups, the DMC(3)-study.  
421 *Pain*, **102**, 167–178.
- 422 3. Slater, M., Perruccio, A. V and Badley, E. M. (2011) Musculoskeletal  
423 comorbidities in cardiovascular disease, diabetes and respiratory disease: the  
424 impact on activity limitations; a representative population-based study. *BMC*  
425 *Public Health*, **11**, 77.
- 426 4. Molsted, S., Tribler, J. and Snorgaard, O. (2012) Musculoskeletal pain in  
427 patients with type 2 diabetes. *Diabetes Res. Clin. Pract.*, **96**, 135–140.
- 428 5. Fernández-de-Las-Peñas, C., Galán-Del-Río, F., Alonso-Blanco, C., et al.  
429 (2010) Referred pain from muscle trigger points in the masticatory and neck-  
430 shoulder musculature in women with temporomandibular disorders. *J. Pain*, **11**,  
431 1295–1304.
- 432 6. Rossi, M., Pasanen, K., Kokko, S., et al. (2016) Low back and neck and  
433 shoulder pain in members and non-members of adolescents' sports clubs: the  
434 Finnish Health Promoting Sports Club (FHPSC) study. *BMC Musculoskelet.*  
435 *Disord.*, **17**, 263.
- 436 7. Wright, A. R., Shi, X. A., Busby-Whitehead, J., et al. (2009) The Prevalence of  
437 Neck and Shoulder Symptoms and Associations with Comorbidities and  
438 Disability: The Johnston County Osteoarthritis Project. *Myopain*, **23**, 34–44.
- 439 8. Hoy, D., March, L., Woolf, A., et al. (2014) The global burden of neck pain:

- 440 estimates from the global burden of disease 2010 study. *Ann. Rheum. Dis.*, **73**,  
441 1309–1315.
- 442 9. March, L., Smith, E. U. R., Hoy, D. G., et al. (2014) Burden of disability due to  
443 musculoskeletal (MSK) disorders. *Best Pract. Res. Clin. Rheumatol.*, **28**, 353–  
444 366.
- 445 10. GBD 2016 Disease and Injury Incidence and Prevalence Collaborators (2017)  
446 Global, regional, and national incidence, prevalence, and years lived with  
447 disability for 328 diseases and injuries for 195 countries, 1990-2016: a  
448 systematic analysis for the Global Burden of Disease Study 2016. *Lancet*  
449 (*London, England*), **390**, 1211–1259.
- 450 11. Nilsen, T. I. L., Holtermann, A. and Mork, P. J. (2011) Physical exercise, body  
451 mass index, and risk of chronic pain in the low back and neck/shoulders:  
452 longitudinal data from the Nord-Trondelag Health Study. *Am. J. Epidemiol.*,  
453 **174**, 267–273.
- 454 12. Webb, R., Brammah, T., Lunt, M., et al. (2003) Prevalence and predictors of  
455 intense, chronic, and disabling neck and back pain in the UK general  
456 population. *Spine (Phila. Pa. 1976)*, **28**, 1195–1202.
- 457 13. Miranda, H., Viikari-Juntura, E., Martikainen, R., et al. (2001) A prospective  
458 study of work related factors and physical exercise as predictors of shoulder  
459 pain. *Occup. Environ. Med.*, **58**, 528–534.
- 460 14. MacGregor, A. J., Andrew, T., Sambrook, P. N., et al. (2004) Structural,  
461 psychological, and genetic influences on low back and neck pain: a study of  
462 adult female twins. *Arthritis Rheum.*, **51**, 160–167.
- 463 15. Ostergren, P.-O., Hanson, B. S., Balogh, I., et al. (2005) Incidence of shoulder  
464 and neck pain in a working population: effect modification between mechanical

- 465 and psychosocial exposures at work? Results from a one year follow up of the  
466 Malmö shoulder and neck study cohort. *J. Epidemiol. Community Health*, **59**,  
467 721–728.
- 468 16. Feleus, A., Bierma-Zeinstra, S. M. A., Miedema, H. S., et al. (2007) Prognostic  
469 indicators for non-recovery of non-traumatic complaints at arm, neck and  
470 shoulder in general practice--6 months follow-up. *Rheumatology (Oxford)*., **46**,  
471 169–176.
- 472 17. Bot, S. D. M., van der Waal, J. M., Terwee, C. B., et al. (2005) Incidence and  
473 prevalence of complaints of the neck and upper extremity in general practice.  
474 *Ann. Rheum. Dis.*, **64**, 118–123.
- 475 18. Enthoven, P., Skargren, E. and Oberg, B. (2004) Clinical course in patients  
476 seeking primary care for back or neck pain: a prospective 5-year follow-up of  
477 outcome and health care consumption with subgroup analysis. *Spine (Phila.*  
478 *Pa. 1976)*., **29**, 2458–2465.
- 479 19. Hoving, J. L., de Vet, H. C. W., Twisk, J. W. R., et al. (2004) Prognostic factors  
480 for neck pain in general practice. *Pain*, **110**, 639–645.
- 481 20. Vos, C. J., Verhagen, A. P., Passchier, J., et al. (2008) Clinical course and  
482 prognostic factors in acute neck pain: an inception cohort study in general  
483 practice. *Pain Med.*, **9**, 572–580.
- 484 21. Fejer, R., Hartvigsen, J. and Kyvik, K. O. (2006) Heritability of neck pain: a  
485 population-based study of 33,794 Danish twins. *Rheumatology (Oxford)*., **45**,  
486 589–594.
- 487 22. Hartvigsen, J., Petersen, H. C., Pedersen, H. C., et al. (2005) Small effect of  
488 genetic factors on neck pain in old age: a study of 2,108 Danish twins 70 years  
489 of age and older. *Spine (Phila. Pa. 1976)*., **30**, 206–208.

- 490 23. Ståhl, M. K., El-Metwally, A. A., Mikkelsen, M. K., et al. (2013) Genetic and  
491 environmental influences on non-specific neck pain in early adolescence: a  
492 classical twin study. *Eur. J. Pain*, **17**, 791–798.
- 493 24. Meng, W., Adams, M. J., Palmer, C. N. A., et al. (2019) Genome-wide  
494 association study of knee pain identifies associations with GDF5 and  
495 COL27A1 in UK Biobank. *Commun. Biol.*, **2**, 321.
- 496 25. Meng, W., Adams, M. J., Hebert, H. L., et al. (2018) A Genome-Wide  
497 Association Study Finds Genetic Associations with Broadly-Defined Headache  
498 in UK Biobank (N=223,773). *EBioMedicine*, **28**, 180–186.
- 499 26. Suri, P., Palmer, M. R., Tsepilov, Y. A., et al. (2018) Genome-wide meta-  
500 analysis of 158,000 individuals of European ancestry identifies three loci  
501 associated with chronic back pain. *PLoS Genet.*, **14**, e1007601.
- 502 27. Bycroft, C., Freeman, C., Petkova, D., et al. (2018) The UK Biobank resource  
503 with deep phenotyping and genomic data. *Nature*, **562**, 203–209.
- 504 28. Smith, B. H., Campbell, H., Blackwood, D., et al. (2006) Generation Scotland:  
505 the Scottish Family Health Study; a new resource for researching genes and  
506 heritability. *BMC Med. Genet.*, **7**, 74.
- 507 29. Smith, B. H., Campbell, A., Linksted, P., et al. (2013) Cohort profile: Generation  
508 scotland: Scottish family health study (GS: SFHS). The study, its participants  
509 and their potential for genetic research on health and illness. *Int. J. Epidemiol.*
- 510 30. Hall, L. S., Adams, M. J., Arnau-Soler, A., et al. (2018) Genome-wide meta-  
511 analyses of stratified depression in Generation Scotland and UK Biobank.  
512 *Transl. Psychiatry*, **8**, 9.
- 513 31. Moayyeri, A., Hammond, C. J., Hart, D. J., et al. (2013) The UK Adult Twin  
514 Registry (TwinsUK Resource). *Twin Res. Hum. Genet.*, **16**, 144–149.

- 515 32. Yang, J., Lee, S. H., Goddard, M. E., et al. (2011) GCTA: a tool for genome-  
516 wide complex trait analysis. *Am. J. Hum. Genet.*, **88**, 76–82.
- 517 33. Watanabe, K., Taskesen, E., van Bochoven, A., et al. (2017) Functional  
518 mapping and annotation of genetic associations with FUMA. *Nat. Commun.*, **8**,  
519 1826.
- 520 34. de Leeuw, C. A., Mooij, J. M., Heskes, T., et al. (2015) MAGMA: generalized  
521 gene-set analysis of GWAS data. *PLoS Comput. Biol.*, **11**, e1004219.
- 522 35. Lai, C. S. L., Fisher, S. E., Hurst, J. A., et al. (2001) A forkhead-domain gene is  
523 mutated in a severe speech and language disorder. *Nature*, **413**, 519–523.
- 524 36. Spiteri, E., Konopka, G., Coppola, G., et al. (2007) Identification of the  
525 transcriptional targets of FOXP2, a gene linked to speech and language, in  
526 developing human brain. *Am. J. Hum. Genet.*, **81**, 1144–1157.
- 527 37. Vernes, S. C., Spiteri, E., Nicod, J., et al. (2007) High-throughput analysis of  
528 promoter occupancy reveals direct neural targets of FOXP2, a gene mutated in  
529 speech and language disorders. *Am. J. Hum. Genet.*, **81**, 1232–1250.
- 530 38. Vargha-Khadem, F., Watkins, K., Alcock, K., et al. (1995) Praxic and nonverbal  
531 cognitive deficits in a large family with a genetically transmitted speech and  
532 language disorder. *Proc. Natl. Acad. Sci. U. S. A.*, **92**, 930–933.
- 533 39. Konopka, G., Bomar, J. M., Winden, K., et al. (2009) Human-specific  
534 transcriptional regulation of CNS development genes by FOXP2. *Nature*, **462**,  
535 213–217.
- 536 40. Acampora, D., Merlo, G. R., Pleari, L., et al. (1999) Craniofacial, vestibular  
537 and bone defects in mice lacking the Distal-less-related gene Dlx5.  
538 *Development*, **126**, 3795–3809.
- 539 41. Yoshihara, M., Adolfsen, B., Galle, K. T., et al. (2005) Retrograde signaling by

- 540 Syt 4 induces presynaptic release and synapse-specific growth. *Science*, **310**,  
541 858–863.
- 542 42. Belton, E., Salmond, C. H., Watkins, K. E., et al. (2003) Bilateral brain  
543 abnormalities associated with dominantly inherited verbal and orofacial  
544 dyspraxia. *Hum. Brain Mapp.*, **18**, 194–200.
- 545 43. Yen, C.-T. and Lu, P.-L. (2013) Thalamus and pain. *Acta Anaesthesiol. Taiwan*,  
546 **51**, 73–80.
- 547 44. Brightwell, J. J. and Taylor, B. K. (2009) Noradrenergic neurons in the locus  
548 coeruleus contribute to neuropathic pain. *Neuroscience*, **160**, 174–185.
- 549 45. Benarroch, E. E. (2006) Pain-autonomic interactions. *Neurol. Sci.*, **27 Suppl 2**,  
550 S130-5133.
- 551 46. Chudler, E. H. and Dong, W. K. (1995) The role of the basal ganglia in  
552 nociception and pain. *Pain*, **60**, 3–38.
- 553 47. Johnston, K. J. A., Adams, M. J., Nicholl, B. I., et al. (2019) Genome-wide  
554 association study of multisite chronic pain in UK Biobank. *PLoS Genet.*, **15**,  
555 e1008164.
- 556 48. Zhao, J., Xu, J., Wang, W., et al. (2018) Long non-coding RNA LINC-01572:28  
557 inhibits granulosa cell growth via a decrease in p27 (Kip1) degradation in  
558 patients with polycystic ovary syndrome. *EBioMedicine*, **36**, 526–538.
- 559 49. Okamoto, N., Fujikawa-Adachi, K., Nishimori, I., et al. (2001) cDNA sequence  
560 of human carbonic anhydrase-related protein, CA-RP X: mRNA expressions of  
561 CA-RP X and XI in human brain. *Biochim. Biophys. Acta*, **1518**, 311–316.
- 562 50. Visscher, P. M., Wray, N. R., Zhang, Q., et al. (2017) 10 Years of GWAS  
563 Discovery: Biology, Function, and Translation. *Am. J. Hum. Genet.*, **101**, 5–22.
- 564 51. Meng, W., Adams, M. J., Reel, P., et al. (2019) Genetic correlations between

565 pain phenotypes and depression and neuroticism. *Eur. J. Hum. Genet.*

566



567

## LEGENDS

568 Figure 1: The Manhattan plot of the GWAS on neck or shoulder pain using the UK  
569 Biobank cohort (N=203,309). The dashed red line indicates the cut-off  $P$  value of  $5 \times$   
570  $10^{-8}$ .

571

572 Figure 2: Tissue expression results on 30 specific tissue types by GTEx in the FUMA.  
573 The dashed line shows the cut-off  $P$  value for significance with Bonferroni adjustment  
574 for multiple hypothesis testing.

575

576 Figure 3: Tissue expression results on 53 specific tissue types by GTEx in the FUMA.  
577 The dashed line shows the cut-off  $P$  value for significance with Bonferroni adjustment  
578 for multiple hypothesis testing.

579

580

# Figure 1

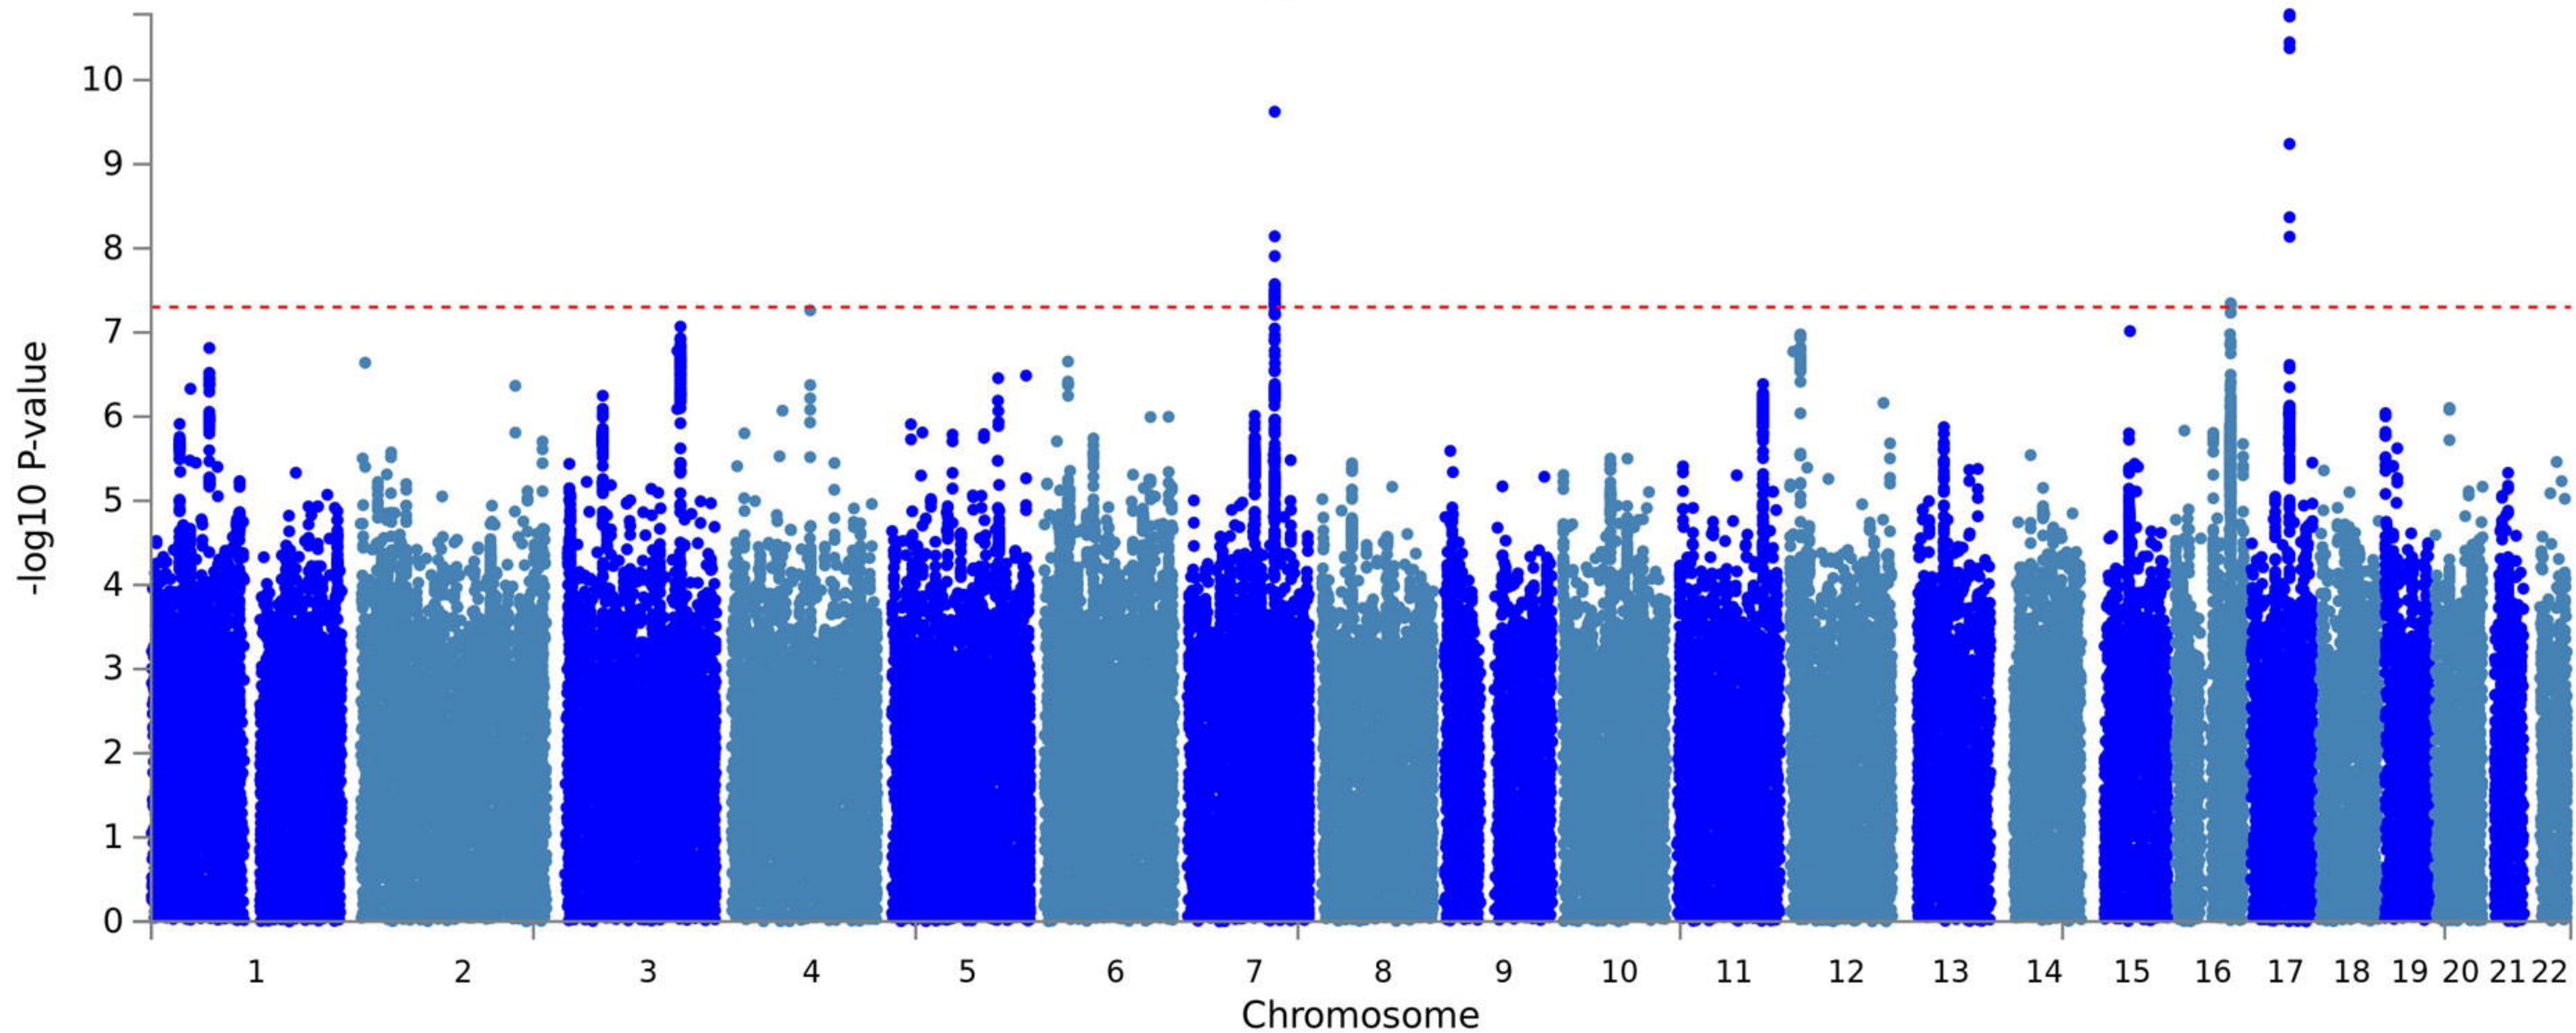

# Figure 2

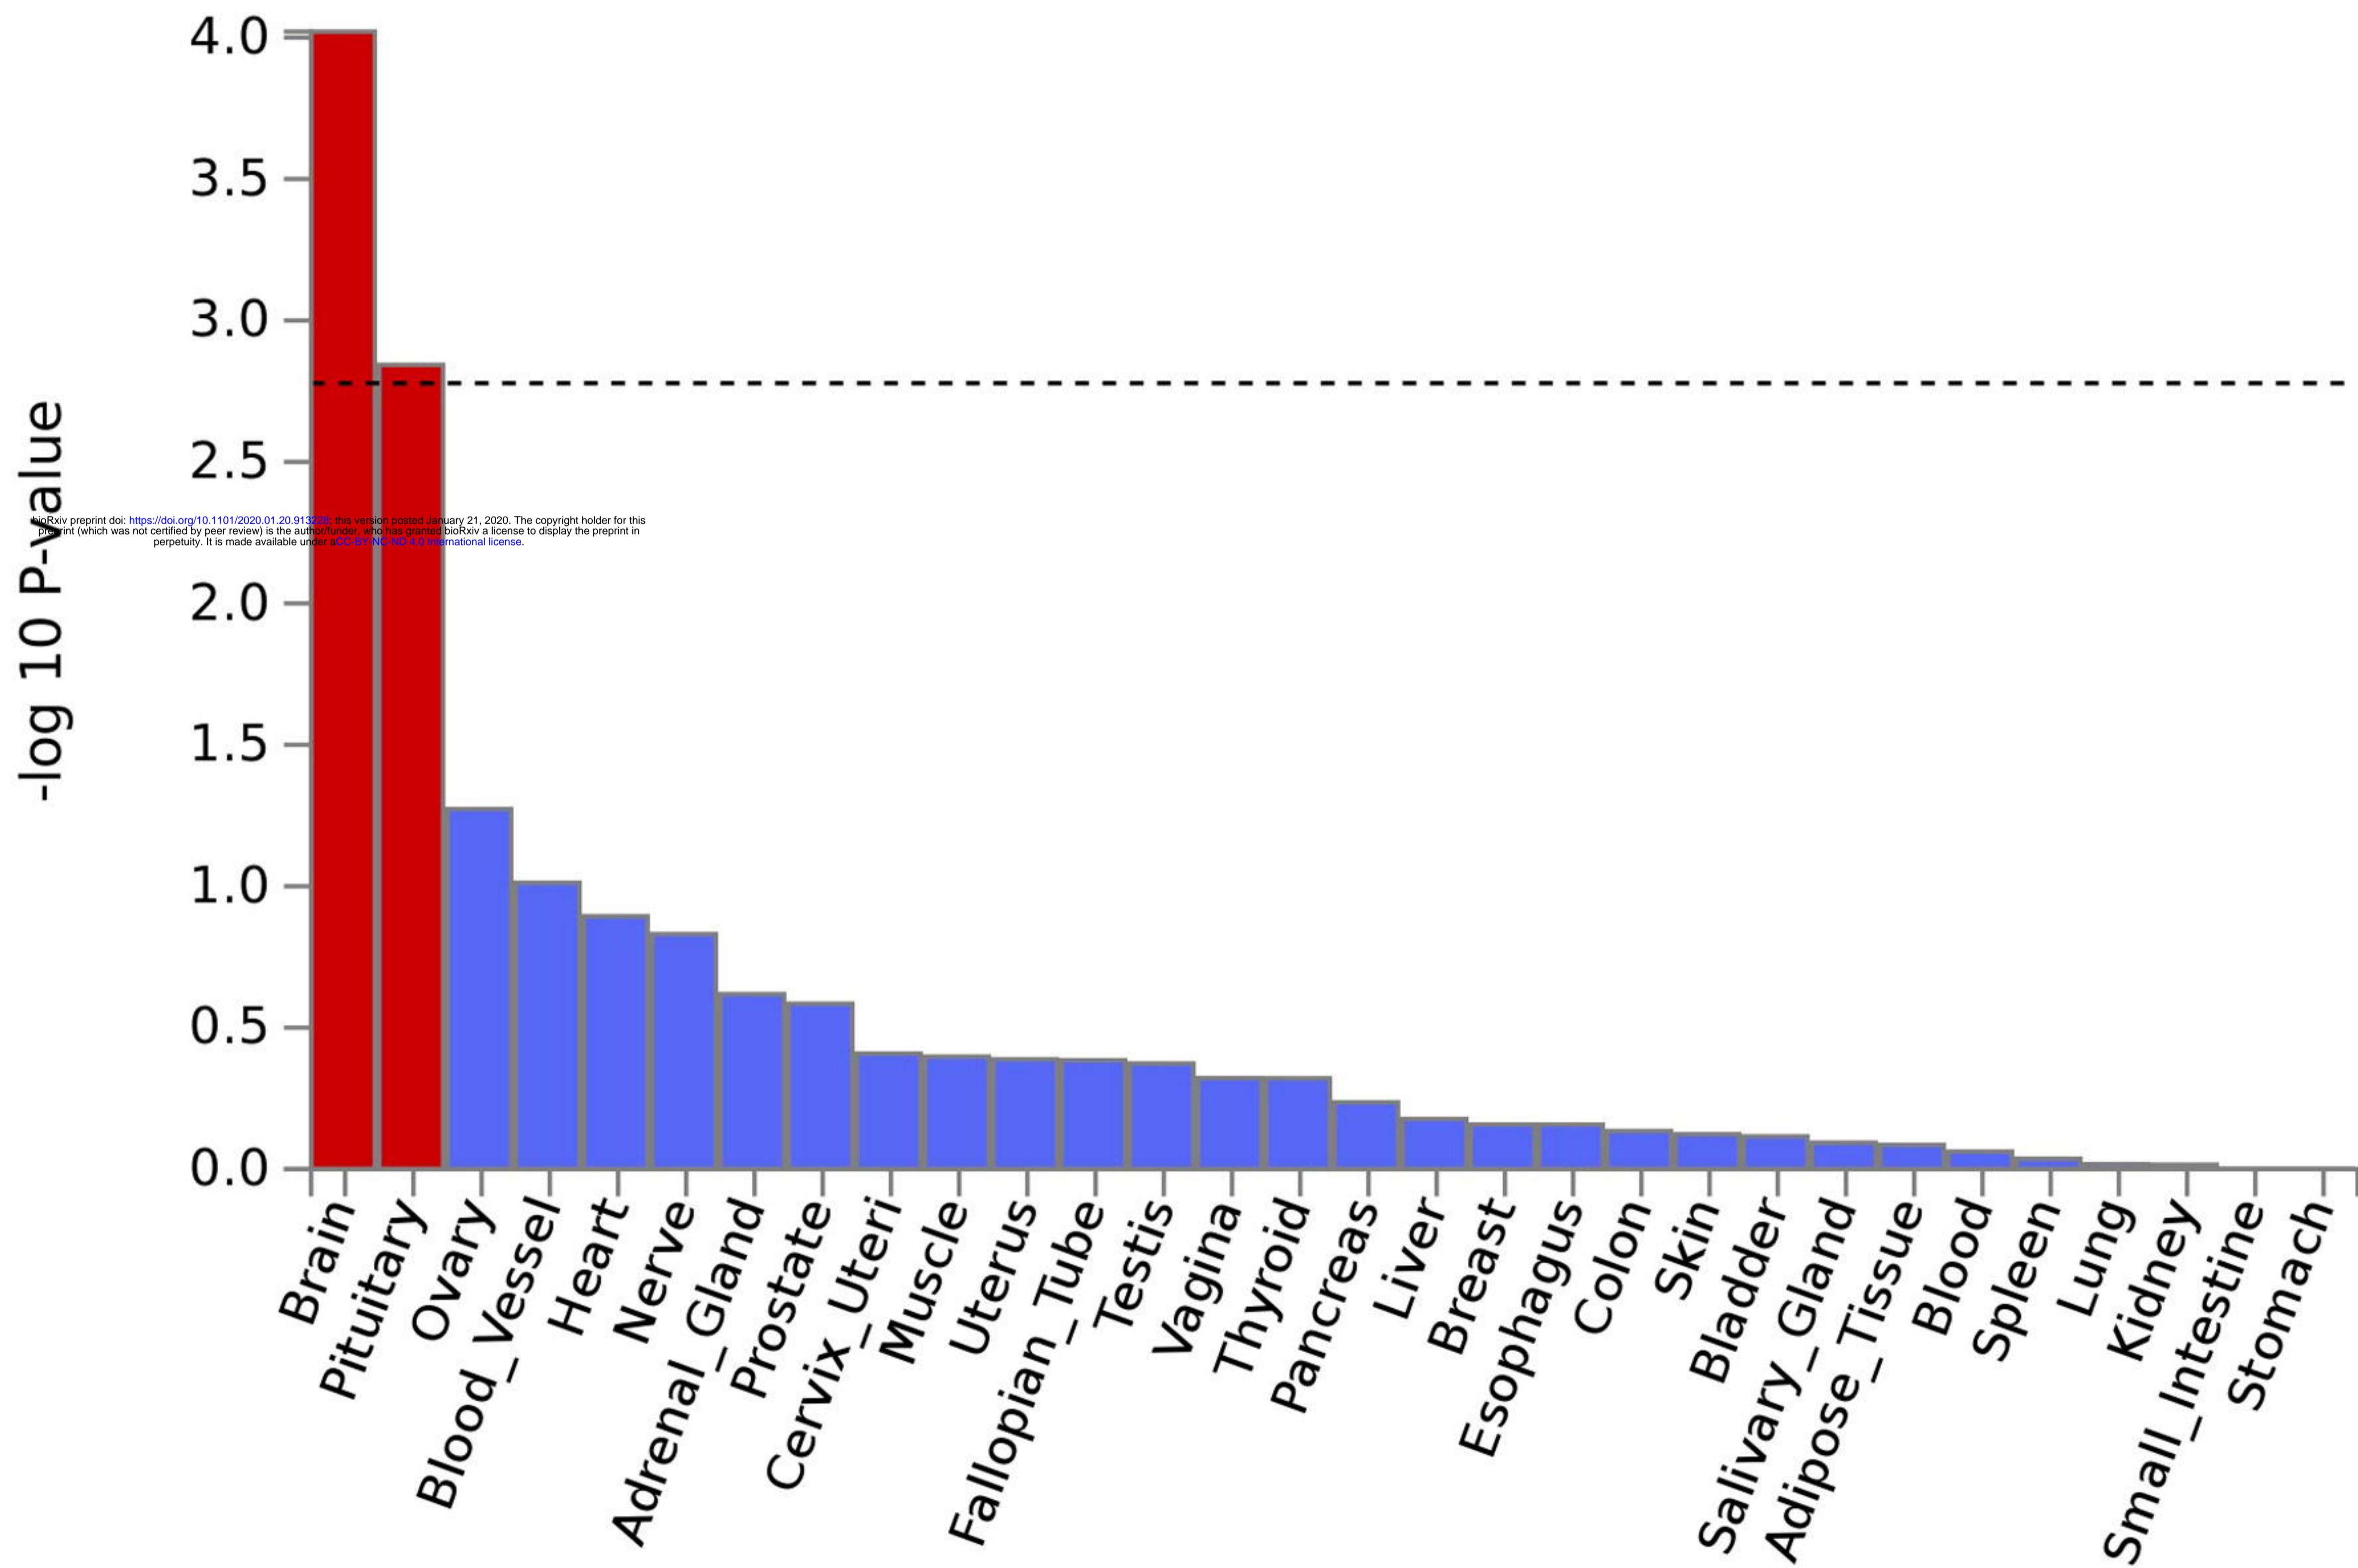

# Figure 3

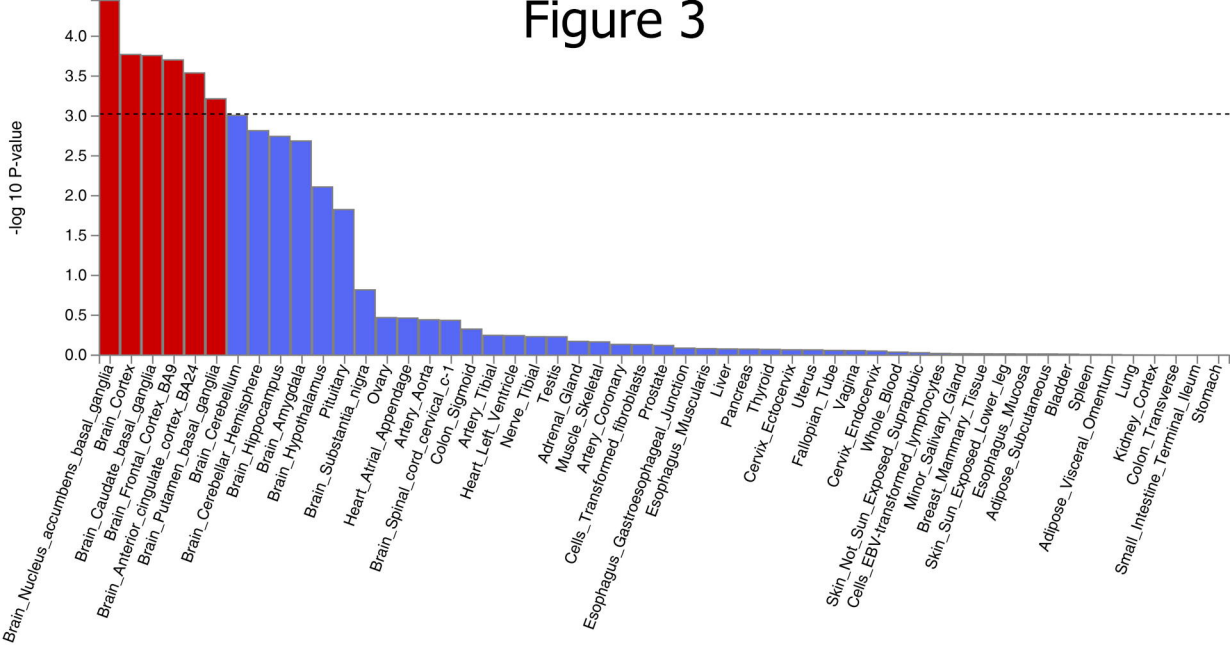

**Table 1.** Clinical characteristics of neck or shoulder pain cases and controls in the UK Biobank

| Covariates               | UK Biobank    |                 | <i>P</i> |
|--------------------------|---------------|-----------------|----------|
|                          | Cases         | Controls        |          |
| Sex (male:female)        | 28093 : 25901 | 71,480 : 77,832 | <0.001   |
| Age (years)              | 57.7 (7.82)   | 56.9 (7.97)     | <0.001   |
| BMI (kg/m <sup>2</sup> ) | 27.8 (4.85)   | 26.7 (4.30)     | <0.001   |

BMI: body mass index

A chi-square test was used to test the difference of gender frequency between cases and controls and an independent t test was used for other covariates.

Continuous covariates were presented as mean (standard deviation).

**Table 2.** The summary statistics of the 4 significant and independent SNPs in the UK Biobank and the replication and meta-analysis results using the GS:SFHS and TwinsUK cohorts

| SNP        | Chr | Position  | UK Biobank<br>Discovery stage |                        |         | GS:SFHS<br>replication |               |         | TwinsUK<br>replication |      |         | Meta-<br>analysis |                        | effects | $r^2$ |
|------------|-----|-----------|-------------------------------|------------------------|---------|------------------------|---------------|---------|------------------------|------|---------|-------------------|------------------------|---------|-------|
|            |     |           | MAF                           | $P$                    | beta    | se                     | $P$           | beta    | se                     | $P$  | beta    | se                | $P$                    |         |       |
| rs2049604  | 7   | 113990352 | 0.3648 (T)                    | $3.26 \times 10^{-8}$  | -0.0080 | 0.0015                 | <b>0.0240</b> | -0.0088 | 0.0039                 | 0.13 | -0.0188 | 0.0122            | $3.19 \times 10^{-9}$  | ---     | 0     |
| rs34291892 | 7   | 114058731 | 0.3772 (C)                    | $2.38 \times 10^{-10}$ | -0.0092 | 0.0014                 | 0.1068        | -0.0064 | 0.0039                 | 0.11 | -0.0196 | 0.0124            | $7.07 \times 10^{-12}$ | ---     | 0     |
| rs62053992 | 16  | 72389872  | 0.1819 (G)                    | $4.50 \times 10^{-8}$  | -0.0098 | 0.0018                 | <b>0.0202</b> | -0.0109 | 0.0047                 | 0.94 | 0.0012  | 0.0158            | $4.36 \times 10^{-9}$  | --+     | 0     |
| rs12453010 | 17  | 50316131  | 0.3926 (T)                    | $1.66 \times 10^{-11}$ | 0.0095  | 0.0014                 | 0.1331        | 0.0058  | 0.0038                 | 0.10 | 0.0199  | 0.0121            | $2.20 \times 10^{-12}$ | +++     | 0     |

rs34291892 was replaced by rs4727799 ( $r^2=0.8736$ ) as it does not exist in the GS:SFHS and TwinsUK cohorts.

UK Biobank N=203,309; GS:SFHS N= 19,632; TwinsUK N= 3,982

Chr: chromosome

MAF: minor allele frequency

Significant  $P$  values in the replication ( $P < 0.05$ ) were in bold.

**Table 3.** The significant genetic correlation results by the LD hub between neck or shoulder pain with other phenotypes

| Trait 1               | Trait 2                      | rg      | P                        |
|-----------------------|------------------------------|---------|--------------------------|
| Neck or shoulder pain | Depressive symptoms          | 0.5522  | 3.41 x 10 <sup>-30</sup> |
| Neck or shoulder pain | Insomnia                     | 0.5377  | 1.21 x 10 <sup>-21</sup> |
| Neck or shoulder pain | Neuroticism                  | 0.4417  | 2.00 x 10 <sup>-29</sup> |
| Neck or shoulder pain | Major depressive disorder    | 0.3968  | 5.75 x 10 <sup>-08</sup> |
| Neck or shoulder pain | Ever vs never smoked         | 0.3082  | 4.14 x 10 <sup>-08</sup> |
| Neck or shoulder pain | Number of children ever born | 0.2616  | 2.03 x 10 <sup>-07</sup> |
| Neck or shoulder pain | Coronary artery disease      | 0.1965  | 1.66 x 10 <sup>-07</sup> |
| Neck or shoulder pain | Waist-to-hip ratio           | 0.1547  | 1.31 x 10 <sup>-05</sup> |
| Neck or shoulder pain | Sleep duration               | -0.2468 | 9.46 x 10 <sup>-07</sup> |
| Neck or shoulder pain | Subjective well being        | -0.2626 | 1.14 x 10 <sup>-06</sup> |
| Neck or shoulder pain | Intelligence                 | -0.3229 | 2.23 x 10 <sup>-17</sup> |
| Neck or shoulder pain | Former vs Current smoker     | -0.3600 | 5.87 x 10 <sup>-06</sup> |
| Neck or shoulder pain | Years of schooling 2016      | -0.4373 | 5.18 x 10 <sup>-54</sup> |
| Neck or shoulder pain | College completion           | -0.4706 | 7.26 x 10 <sup>-26</sup> |
| Neck or shoulder pain | Age of first birth           | -0.4812 | 8.95 x 10 <sup>-37</sup> |

rg: genetic correlation

The cut-off *P* value is 0.0002 (0.05/234).
